# Supplementary material for: A paper-analytical device for detecting bisphenol-A in foods
Source: Royal Society of Chemistry journal article supplement (doi:10.1039/d2ay00720g), 2022-01-01
Supplement: d2ay00720g1.pdf [file d2ay00720g1.pdf]

10 **Figure Captions**

11 Fig.S1. Reaction scheme for synthesis of BPA hapten

12 Fig.S2(A). Spectrums of product (b)

13 Fig.S2(B). Spectrums of product (c)

14 Fig.S3. Standard curves of the PADs assay in PBS (■) and drinking water (●)

15 Fig.S4. Standard curves of the PADs assay in PBS (■) and in 16-fold (▼), 32-fold (●)

16 and 64-fold (▲) diluted peanut oil sample solution

17 Fig.S5. Standard curves of the PADs assay in 8-fold (●) diluted green tea beverage and

18 PBS (■)

19

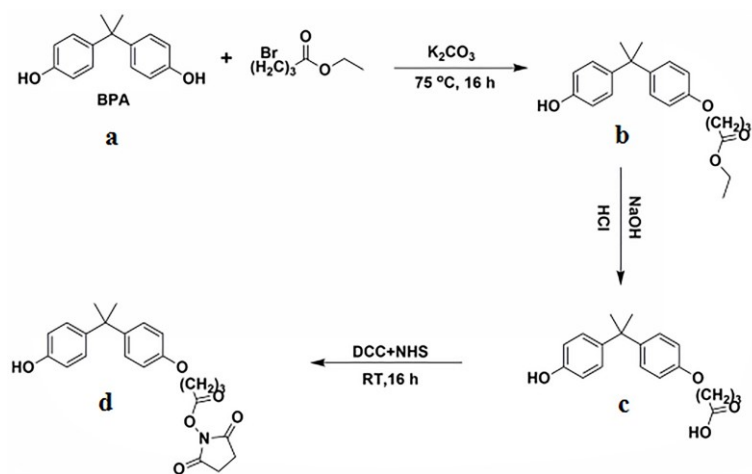

Fig. S1. Reaction scheme for synthesis of BPA hapten <sup>1</sup>

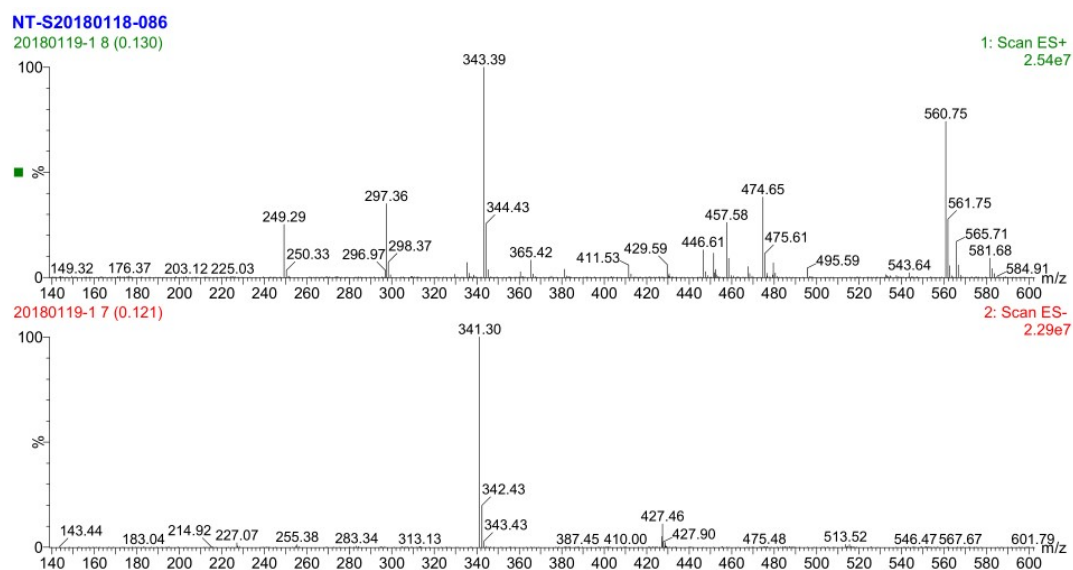

Fig.S2(A). Spectrums of product (b)

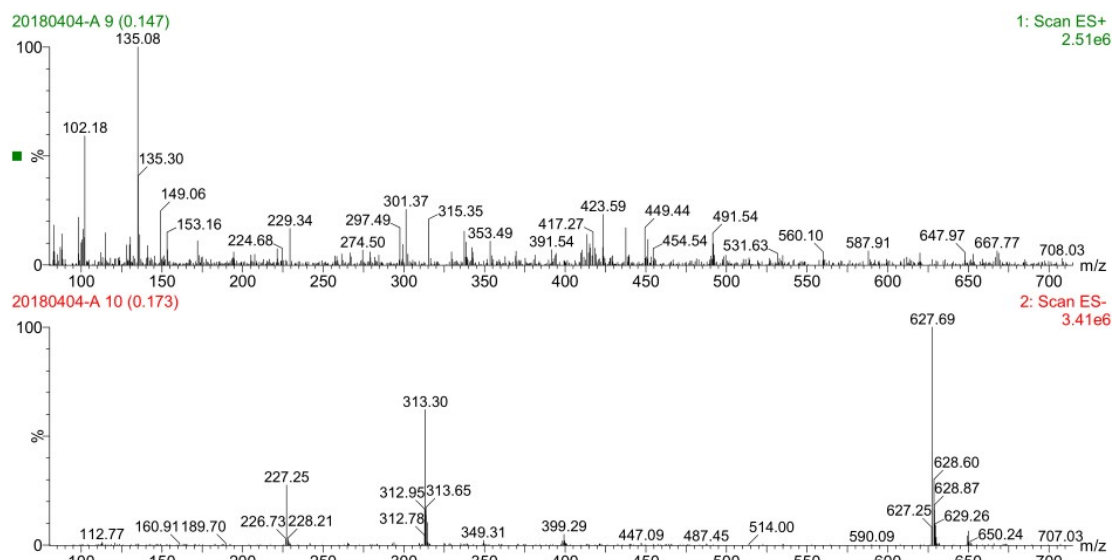

Fig.S2(B). Spectrums of product (c)

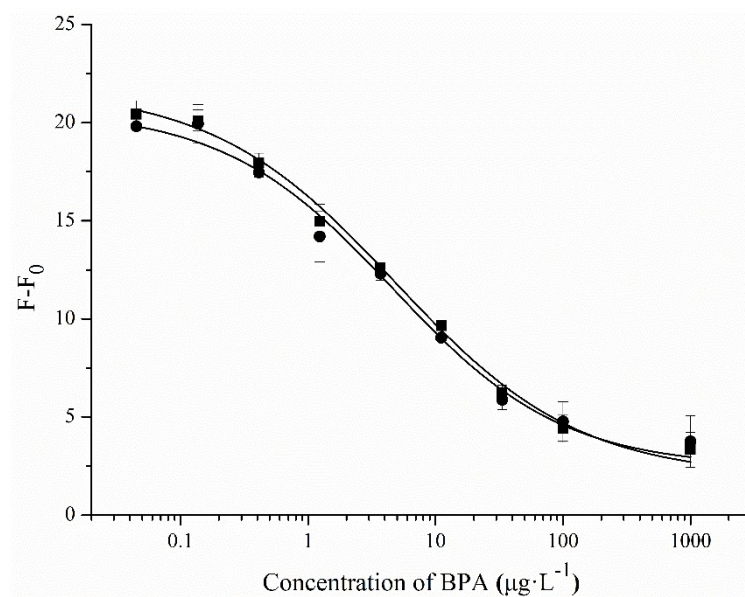

28

29

Fig. S3. Standard curves of the PADs assay in PBS (■) and drinking water (●)

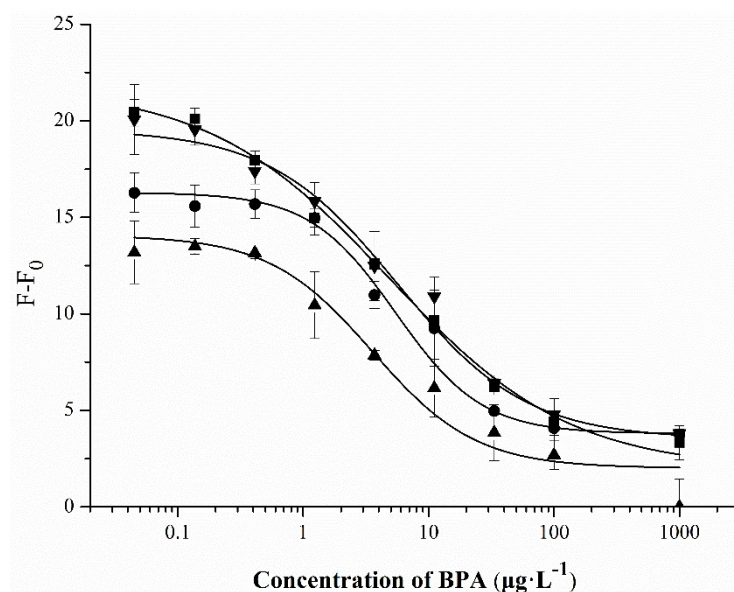

31

32 Fig. S4. Standard curves of the PADs assay in PBS ( $\blacksquare$ ) and in 16-fold ( $\blacktriangle$ ), 32-fold ( $\bullet$ )  
 33 and 64-fold ( $\blacktriangledown$ ) diluted peanut oil sample solution

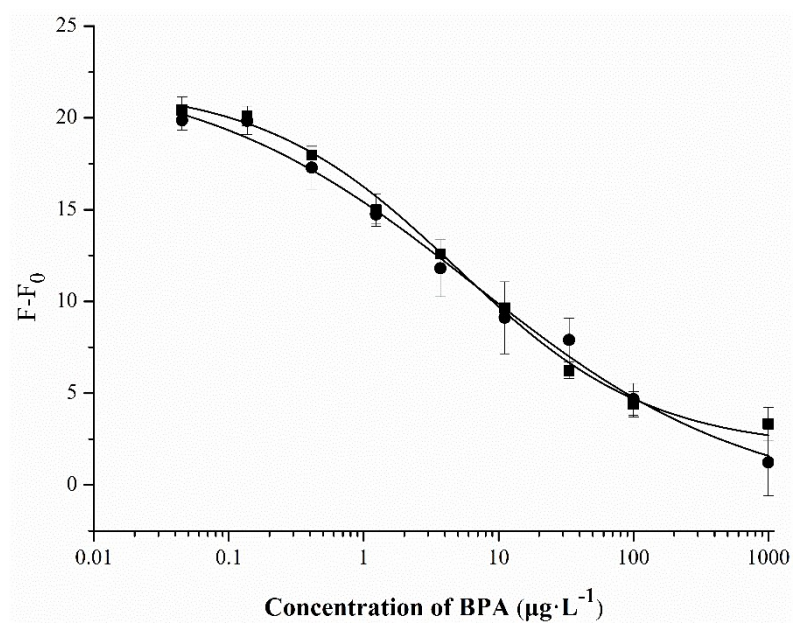

35  
 36 Fig. S5. Standard curves of the PADs assay in 8-fold (●) diluted green tea beverage  
 37 and PBS (■)

38
